# Supplementary material
Source: Springer Nature journal article supplement (https://www.springermedizin.de/resource/supplementary/12885_2010_2898_MOESM3_ESM.pdf/9462260)
Supplement: MOESM3 [file 9462260]

A: 7<sup>th</sup> TNM classification

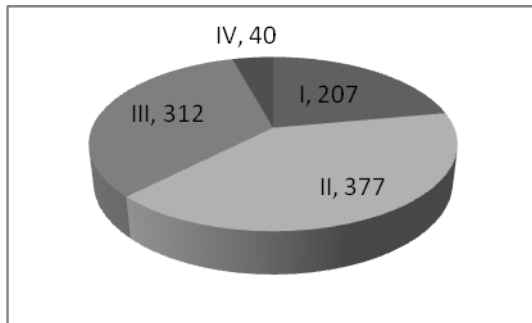

B: EM was categorized into pT staging

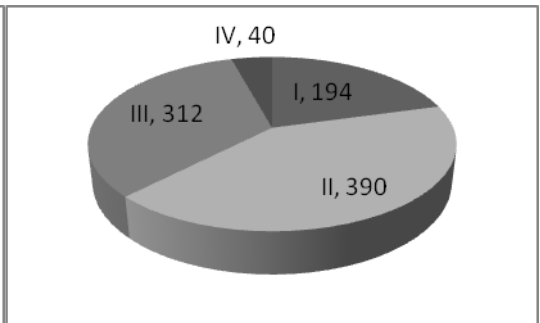

C: EM was categorized into pN staging

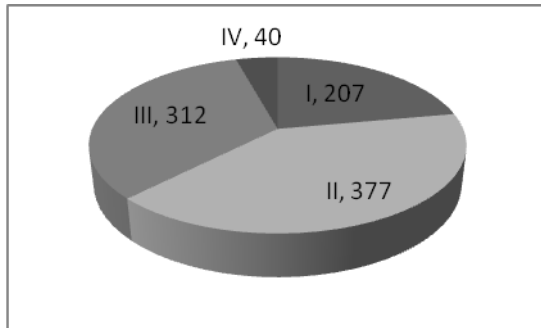

5-Year Survival Rate (%)

|     | A  | B  | C  |
|-----|----|----|----|
| I   | 88 | 90 | 88 |
| II  | 78 | 78 | 78 |
| III | 62 | 62 | 62 |
| IV  | 27 | 27 | 27 |
